# Supplementary material for: Polymorphism, pseudo-polymorphism, and conformerism in the crystal structure of piperazine-N,N′-bis(N,O-diphenyl phosphoramidate)
Source: Royal Society of Chemistry journal article supplement (doi:10.1039/c7ce00039a), 2017-01-01
Supplement: c7ce00039a1.pdf [file c7ce00039a1.pdf]

## Polymorphism, Pseudo-polymorphism, and Conformerism in the Crystal Structure of Piperazine-N,N'-bis(N, O-diphenyl phosphoramidate) †

Khodayar Gholivand,\*<sup>a</sup> Mahdieh Hosseini,<sup>a</sup> Ali A. Ebrahimi Valmoozi,<sup>a</sup> Kaveh Farshadfar,<sup>a</sup>

<sup>a</sup> Department of Chemistry, Faculty of Science, *Tarbiat Modares University*, Tehran, Iran

### Electronic Supplementary Information†

#### Experimental Section

##### General

All chemicals and solvents used in the syntheses were commercially available and were used without further purification. <sup>1</sup>H, <sup>31</sup>P, and <sup>13</sup>C NMR spectra were recorded on a Bruker Avance DRX500 MHz NMR spectrometer. IR spectrum was recorded on a Nicolet 510P spectrophotometer using KBr disks

##### Synthesis of Piperazine -N,N'-bis (N,O-diphenyl phosphoramidate), *L*<sub>OPhAn</sub>

(C<sub>6</sub>H<sub>5</sub>O)(C<sub>6</sub>H<sub>5</sub>NH)P(O)Cl was prepared by the reaction of Aniline with (C<sub>6</sub>H<sub>5</sub>O)P(O)Cl<sub>2</sub> in 2: 1 molar ratio. Aniline was added dropwise to a CH<sub>3</sub>CN solution (20 ml) of (C<sub>6</sub>H<sub>5</sub>O)P(O)Cl<sub>2</sub> at 0 °C. After 4 hours stirring, the solvent was removed in vacuum and the resulting was washed with distilled water and dried.

The compound, *L*<sub>OPhAn</sub> was synthesized by the reaction of 2mmol of (C<sub>6</sub>H<sub>5</sub>O)(C<sub>6</sub>H<sub>5</sub>NH)P(O)Cl and one mmol of piperazine in the presence of Et<sub>3</sub>N as HCl scavenger in CH<sub>2</sub>Cl<sub>2</sub> at room temperature. After stirring for 24 h, the solvent was evaporated and the residue was washed with distilled water and dried. Physical and spectroscopic data of *L*<sub>OPhAn</sub> are presented below:

FT-IR (KBr pellet, cm<sup>-1</sup>): 2916.2 (s), 1597.5 (s), 1492.4 (s), 1222.0 (P=O), 1117.6 (P–O), 928.9 (s), 754.8 (P–N). m.p. 243 °C. <sup>1</sup>H NMR (500.13 MHz, d<sub>6</sub>-DMSO, 25°C, TMS); δ= 2.79–2.94 (m, 8 H, CH<sub>2</sub>), 6.85–6.89 (m, 2 H, Ar), 7.02–7.03 (m, 4 H, Ar), 7.11–7.20 (m, 8 H, Ar), 7.33–7.36 (m, 6 H, Ar), 8.06 (2 H, <sup>2</sup>J<sub>PNH</sub> = 9.3 Hz, 2 H, NHC<sub>6</sub>H<sub>5</sub>) ppm. <sup>13</sup>CNMR (125.75 MHz, d<sub>6</sub>-DMSO, 25°C, TMS); δ= 43.93 (d, <sup>2</sup>J<sub>PC</sub> = 3.5 Hz, 4 C, CH<sub>2</sub>), 117.56 (m, 4 C, ortho-HNC<sub>6</sub>H<sub>5</sub>), 120.35 (m, 2 C, para-HNC<sub>6</sub>H<sub>5</sub>), 120.80 (m, 4 C, ortho-OC<sub>6</sub>H<sub>5</sub>), 124.48 (m, 2 C, para-OC<sub>6</sub>H<sub>5</sub>), 128.90 (m, 4 C, meta-OC<sub>6</sub>H<sub>5</sub>), 129.66 (m, 4 C, meta-HNC<sub>6</sub>H<sub>5</sub>), 140.74 (s, 2 C, ipso-HNC<sub>6</sub>H<sub>5</sub>), 150.48 (d, <sup>2</sup>J<sub>PC</sub> = 5.7 Hz, 2 C, ipso-OC<sub>6</sub>H<sub>5</sub>) ppm. <sup>31</sup>P{<sup>1</sup>H} and <sup>31</sup>P NMR (202.45 MHz, d<sub>6</sub>-DMSO, 25°C, H<sub>3</sub>PO<sub>4</sub> external); δ= 4.51 (m) ppm.

##### Crystal structure determination

X-ray data of compounds were collected methods and refined by full-matrix least squares methods against F<sup>2</sup> in anisotropic approximation (for non-H atoms) using SHELXL97<sup>1</sup> for forms I and III and SHELXTL<sup>2</sup> for Form II.MeOH. For I and III, The H(C) atom positions were calculated, and they were refined in isotropic the approximation in riding model with the U<sub>iso</sub>(H) parameters equal to 1.2 U<sub>eq</sub>(C<sub>i</sub>), where U(C<sub>i</sub>) are respectively the equivalent thermal parameters of the carbon atoms to which the corresponding H atoms are bonded. The positions of H(N) atoms were located from the Fourier density synthesis and refined in the isotropic approximation. For II.MeOH, The H atoms of the NH and OH groups were localized in the difference Fourier-syntheses. The H(C) atoms were placed in calculated positions. All hydrogen atoms were included in the refinement within riding model with fixed isotropic displacement parameters (U<sub>iso</sub>(H) = 1.2U<sub>eq</sub>(C, N, O)). Structural illustrations have been drawn with MERCURY.<sup>3</sup> The Crystallographic and refinement data are summarized in [Table S1](#). Independent part of the unit cell which contains the minor component of the disordered atoms of II.MeOH is shown in [Figure S1](#).

## Results and discussion

**Table S1.** Crystal Data and Structural Refinement for Compounds I, II.MeOH and III

|                                       | (I)                                                                          | (II. MeOH)                                                                                           | (III)                                                                        |
|---------------------------------------|------------------------------------------------------------------------------|------------------------------------------------------------------------------------------------------|------------------------------------------------------------------------------|
| formula                               | C <sub>28</sub> H <sub>30</sub> N <sub>4</sub> O <sub>4</sub> P <sub>2</sub> | C <sub>28</sub> H <sub>30</sub> N <sub>4</sub> O <sub>4</sub> P <sub>2</sub> , 2(C H <sub>4</sub> O) | C <sub>28</sub> H <sub>30</sub> N <sub>4</sub> O <sub>4</sub> P <sub>2</sub> |
| fw                                    | 548.50                                                                       | 612.58                                                                                               | 548.50                                                                       |
| $\lambda/\text{\AA}$                  | 0.71073                                                                      | 0.71073                                                                                              | 0.71073                                                                      |
| T/K                                   | 150(2)                                                                       | 100(2)                                                                                               | 100(2)                                                                       |
| crystal.system                        | Monoclinic                                                                   | Monoclinic                                                                                           | Orthorhombic                                                                 |
| space group                           | P <sub>2</sub> <sub>1</sub> /c                                               | P <sub>2</sub> <sub>1</sub> /c                                                                       | P 2 <sub>1</sub> 2 <sub>1</sub> 2 <sub>1</sub>                               |
| a/ $\text{\AA}$                       | 9.422(3)                                                                     | 10.4656(4)                                                                                           | 12.9321(4)                                                                   |
| b/ $\text{\AA}$                       | 10.045(3)                                                                    | 13.8598(5)                                                                                           | 19.0714(6)                                                                   |
| c/ $\text{\AA}$                       | 14.165(4)                                                                    | 11.2698(4)                                                                                           | 21.9285(7)                                                                   |
| $\alpha/^\circ$                       | 90                                                                           | 90                                                                                                   | 90                                                                           |
| $\beta/^\circ$                        | 94.264(5)                                                                    | 110.7680(10)                                                                                         | 90                                                                           |
| $\gamma/^\circ$                       | 90                                                                           | 90                                                                                                   | 90                                                                           |
| V/ $\text{\AA}^3$                     | 1336.9(6)                                                                    | 1528.48(10)                                                                                          | 5408.3(3)                                                                    |
| D <sub>calc</sub> /Mg m <sup>-3</sup> | 1.363                                                                        | 1.331                                                                                                | 1.347                                                                        |
| Z                                     | 2                                                                            | 2                                                                                                    | 8                                                                            |
| $\mu/\text{mm}^{-1}$                  | 0.205                                                                        | 0.191                                                                                                | 0.203                                                                        |
| F(000)                                | 576                                                                          | 648                                                                                                  | 2304                                                                         |
| 2 $\theta/^\circ$                     | 58                                                                           | 60                                                                                                   | 58                                                                           |
| R(int)                                | 0.0372                                                                       | 0.0288                                                                                               | 0.0212                                                                       |
| GOOF                                  | 0.968                                                                        | 1.050                                                                                                | 1.065                                                                        |
| R <sub>1</sub> (I > 2 $\sigma$ (I))   | 0.0427                                                                       | 0.0491                                                                                               | 0.0320                                                                       |
| wR <sub>2</sub> (I > 2 $\sigma$ (I))  | 0.1029                                                                       | 0.1184                                                                                               | 0.0844                                                                       |
| CCDC No.                              | 1027076                                                                      | 1424112                                                                                              | 1027078                                                                      |

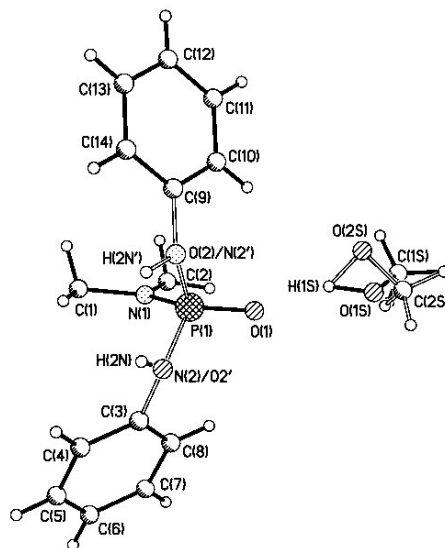

**Figure S1.** Independent part of the II.MeOH unit cell. The methanol solvate molecule is disordered over two positions with 0.67/0.33 occupancies. N(2)H group and O(2) atom are also disordered over two positions with 0.67/0.33 occupancies.

## The Cambridge Structural Database (CSD) analysis for describing conformational features of phosphoramidates.

The Cambridge Structural Database (CSD) analysis for the investigation of the conformational behavior of phosphoramidate compounds was carried out using CSD, version 5.38, November 2016 update. The search was based on the fragment shown in Fig. S2(a). 43 hits were found and the different torsion angles of these molecules were defined. The two-step clustering analysis, performed with IBM SPSS Statistics 24.0, was used for the classifying the torsion angles of different molecules. First, molecules were clustered based on  $\theta_1$  and  $\theta_2$  (clustering No.1) and then  $\theta_3$  and  $\theta_4$  (clustering No.2). The Refcodes, torsion angles of CSD search and cluster membership of each molecule are shown in Table S2. Distributions of the clusters for clustering 1 and clustering 2 are shown in Table S3. Refcodes and X-ray geometrical parameters of intramolecular interactions involved in the third cluster of clustering 2, are shown in Table S4.

**Table S2** Refcodes, determined  $\theta_1$ -  $\theta_5$  and the clustering membership of the molecules found searching CSD and I, II, III-A and III-B.

| Refcode      | NPNC( $\theta_1$ ) | OPNC( $\theta_2$ ) | NPOC( $\theta_3$ ) | OPOC( $\theta_4$ ) | CN <sup>^</sup> OC( $\theta_5$ ) | Clustering 1 Membership | Clustering 2 Membership |
|--------------|--------------------|--------------------|--------------------|--------------------|----------------------------------|-------------------------|-------------------------|
| AWUFOO       | 76.29              | 48.01              | 70.24              | 49.96              | 15.65                            | 3                       | 2                       |
| CEPSEV       | 50.25              | 76.21              | 162.33             | 73.99              | 174.27                           | 3                       | 1                       |
| CEQBEG       | 54.72              | 73.29              | 157.57             | 78.02              | 176.28                           | 3                       | 1                       |
| CEQBIK (A)   | 48.73              | 79.17              | 160.1              | 73.48              | 176.65                           | 3                       | 1                       |
| CEQBIK (B)   | 50.14              | 77.6               | 160.14             | 72.74              | 178.19                           | 3                       | 1                       |
| DEZSOQ       | 45.62              | 84.02              | 163.46             | 68.54              | 176.95                           | 3                       | 1                       |
| EDEXAO (A)   | 157.87             | 28.53              | 90.86              | 42.76              | 85.72                            | 2                       | -                       |
| EDEXAO (B)   | 162.53             | 32.39              | 88.43              | 45.37              | 93.77                            | 2                       | -                       |
| ERUFIH       | 39.15              | 170.92             | 173.32             | 46.42              | 109.56                           | 1                       | 1                       |
| EXISIO       | 168.78             | 64.18              | 58.2               | 179.66             | 85.04                            | 2                       | 3                       |
| GEPMEU       | 179.33             | 57.67              | 79.95              | 43.06              | 101.62                           | 2                       | 2                       |
| GUDGOC       | 67.74              | 57.98              | 173.91             | 64.3               | 136.66                           | 3                       | 1                       |
| LIGRUO       | 131.96             | 0.34               | 154.67             | 25.74              | 22.99                            | 2                       | 1                       |
| MEKSIE (A)   | 24.07              | 149.5              | 141.33             | 16.99              | 147.65                           | 1                       | 1                       |
| MEKSIE(B)    | 33.47              | 159.16             | 142.09             | 17.86              | 142.55                           | 1                       | 1                       |
| MUBPIJ       | 55.89              | 69.47              | 79.6               | 40.6               | 70.44                            | 3                       | 2                       |
| NANROJ       | 68.66              | 56.12              | 168.81             | 45.65              | 119.07                           | 3                       | 1                       |
| NANROP       | 167.42             | 41.92              | 43.97              | 173.76             | 108.84                           | 2                       | 3                       |
| NIBPAQ       | 169.89             | 44.19              | 53.43              | 177.55             | 97.66                            | 2                       | 3                       |
| OCAVIZ       | 40.32              | 170.63             | 175.9              | 51.62              | 102.96                           | 1                       | 1                       |
| OXPOTU (A)   | 37.91              | 171.07             | 79.23              | 49.94              | 166.37                           | 1                       | -                       |
| OXPOTU (B)   | 38.09              | 169.76             | 41                 | 84.73              | 51.35                            | 1                       | -                       |
| OXPOTU01 (A) | 38.84              | 169.8              | 40.83              | 83.73              | 53.98                            | 1                       | -                       |
| OXPOTU01 (B) | 39.11              | 170.51             | 75.09              | 50.52              | 159.83                           | 1                       | -                       |
| PECNOC (A)   | 69.73              | 56.2               | 144.88             | 24.07              | 112.18                           | 3                       | -                       |
| PECNOC (B)   | 148.16             | 17.8               | 178.24             | 56.22              | 20.46                            | 2                       | -                       |
| PECNOC01     | 80.13              | 45.61              | 81.11              | 40.76              | 5.01                             | 3                       | -                       |
| PECSIZ       | 77.19              | 49.18              | 30.75              | 153.55             | 145.32                           | 3                       | 3                       |

|             |        |        |        |        |        |   |   |
|-------------|--------|--------|--------|--------|--------|---|---|
| PECSOF      | 75.26  | 51.08  | 31.26  | 154.1  | 139.41 | 3 | 3 |
| PECSUL      | 55.85  | 175.64 | 46.22  | 81.56  | 101.08 | 1 | 2 |
| QIBBAF      | 119.94 | 114.37 | 159.8  | 76.28  | 34.79  | 3 | 1 |
| QIQJOR      | 75.66  | 52.28  | 58.07  | 67.55  | 58.49  | 3 | 2 |
| QIQJUX      | 178.26 | 55.32  | 75.63  | 48.32  | 106.6  | 2 | 2 |
| RISCIF (A)  | 28.59  | 156    | 116.09 | 8.16   | 168.37 | 1 | 1 |
| RISCIF (B)  | 29.18  | 156.32 | 119.68 | 3.29   | 166.05 | 1 | 1 |
| SACVOI      | 179.55 | 54.92  | 79.59  | 43.54  | 97.13  | 2 | 2 |
| SACYEA      | 168.14 | 66.73  | 50.23  | 179.53 | 86.98  | 2 | 3 |
| SOYBUD (A)  | 55.64  | 71.36  | 161.69 | 74.96  | 169.42 | 3 | 1 |
| SOYBUD (B)  | 45.91  | 82.17  | 53.87  | 71.19  | 120.76 | 3 | 2 |
| SOYCAK      | 62.06  | 64.59  | 162.78 | 75.17  | 155.23 | 3 | 1 |
| TASQIN      | 67.33  | 58.89  | 154.94 | 33.07  | 121.78 | 3 | 1 |
| TEGDAK      | 51.57  | 176.51 | 157.59 | 81.35  | 73.37  | 1 | 1 |
| VABBOQ (A)  | 11.62  | 139.23 | 143.48 | 18.86  | 154.22 | 1 | 1 |
| VABBOQ (B)  | 44.11  | 172.21 | 174.63 | 50.77  | 109.77 | 1 | 1 |
| VABBUW      | 17.7   | 145.93 | 146.72 | 22.34  | 149.75 | 1 | 1 |
| VABCAD (A)  | 44.09  | 173.74 | 179.12 | 54.5   | 105.12 | 1 | 1 |
| VABCAD (B)  | 4.3    | 133.43 | 141.95 | 17.13  | 162.25 | 1 | 1 |
| VORVAB      | 172.52 | 44.46  | 78.67  | 51.11  | 110.08 | 2 | 2 |
| YUPVEL      | 49.18  | 75.73  | 60.38  | 62.77  | 18.2   | 3 | 2 |
| ZUFPEV      | 31.22  | 159.85 | 145.95 | 21.72  | 140.52 | 1 | 1 |
| ZUFPOF (A)  | 44.82  | 170.95 | 169.08 | 45.73  | 117.28 | 1 | 1 |
| ZUFPOF (B)  | 38.09  | 164.45 | 169.82 | 46.84  | 121.49 | 1 | 1 |
| I           | 63.4   | 63.2   | 171.4  | 48.6   | 136.4  | 3 | 1 |
| II          | 39.9   | 85.2   | 49.8   | 75.6   | 12.7   | 3 | 2 |
| III-A(up)   | 62     | 63.5   | 165.7  | 42.9   | 137.7  | 3 | 1 |
| III-A(down) | 58.1   | 68.1   | 170.5  | 47.5   | 154.5  | 3 | 1 |
| III-B(up)   | 68.2   | 58     | 176.5  | 62.4   | 139.2  | 3 | 1 |
| III-B(down) | 57.4   | 68.8   | 46     | 78.2   | 16.9   | 3 | 2 |

Table S3 Clustering No.1 and 2; clusters distribution

|                          | cluster  | N         | % of Combined | % of Total    |
|--------------------------|----------|-----------|---------------|---------------|
| <b>Clustering (No.1)</b> | 1        | 20        | 34.5%         | 34.5%         |
|                          | 2        | 12        | 20.7%         | 20.7%         |
|                          | 3        | 26        | 44.8%         | 44.8%         |
|                          | Combined | 58        | 100.0%        | 100.0%        |
| <b>Total</b>             |          | <b>58</b> |               | <b>100.0%</b> |
| <b>Clustering (No.2)</b> | 1        | 31        | 63.3%         | 63.3%         |
|                          | 2        | 12        | 24.5%         | 24.5%         |
|                          | 3        | 6         | 12.2%         | 12.2%         |
|                          | Combined | 49        | 100.0%        | 100.0%        |
| <b>Total</b>             |          | <b>49</b> |               | <b>100.0%</b> |

**TableS4** Refcodes and X-ray geometrical parameters of intramolecular interactions involved in the third cluster of clustering **2**.

| Refcode             | Involved intramolecular interactions            | HB Graph set                    | X-ray Geometry (Å/deg)*    |
|---------------------|-------------------------------------------------|---------------------------------|----------------------------|
| <b>AWUFOO</b>       | CH <sub>OPh</sub> ···π <sub>central amine</sub> | ---                             | 3.515/154                  |
| <b>GEPMEU</b>       | C-H <sub>OR</sub> ···O <sub>P=O</sub>           | S <sub>1</sub> <sup>1</sup> (5) | 2.803/2.999(3)/91          |
| <b>MUBPIJ</b>       | CH <sub>OPh</sub> ···π <sub>central amine</sub> | ---                             | 3.684/153                  |
| <b>PECSUL</b>       | Cyclic OR group                                 | ---                             | ---                        |
| <b>QIQJOR</b>       | CH <sub>OPh</sub> ···π <sub>central amine</sub> | ---                             | 3.507/152                  |
| <b>QIQJUX</b>       | CH <sub>OPh</sub> ···π <sub>central amine</sub> | ---                             | 2.889/150                  |
| <b>SOYBUD(B)</b>    | Cyclic OR group                                 | ---                             | ---                        |
| <b>SACVOI</b>       | C-H <sub>OR</sub> ···O <sub>P=O</sub>           | S <sub>1</sub> <sup>1</sup> (5) | 2.557(4)/3.050(4)/106.8(3) |
| <b>VORVAB</b>       | CH···π <sub>OPh</sub>                           | ---                             | 2.644/153                  |
| <b>YUPVEL</b>       | C-H <sub>OPh</sub> ···O <sub>P=O</sub>          | S <sub>1</sub> <sup>1</sup> (6) | 2.518/3.167(2)/127         |
| <b>II</b>           | C-H <sub>OPh</sub> ···O <sub>P=O</sub>          | S <sub>1</sub> <sup>1</sup> (6) | 2.675/3.323(2)/126         |
| <b>III-B (down)</b> | C-H <sub>OPh</sub> ···O <sub>P=O</sub>          | S <sub>1</sub> <sup>1</sup> (6) | 2.721/3.287(2)/119         |

\* Geometrical parameters of HB-bond: H···A/ D···A/<D-H···A, C-H···π: CH···Cg/ C-H-Cg

### The Cambridge Structural Database (CSD) analysis of CH···π contact in phosphoramidate compounds

The CH···π contacts of CSD searched molecules based on the fragment shown in [Fig.S2 \(a\)](#) have been analyzed. The searches based on geometrical parameters of the H···Cg contact distance, C-H···Cg for CH···π interactions of phosphoramidate compounds are shown in [Figures S2 \(b\)](#) and [\(c\)](#). Based on the contact distance histogram, most of the CH···π distances in three polymorphs are near the relative maximum in the number of examples around 3.2 to 3.8 Å. Moreover, the CH···π angle histogram shows that the most molecules lie between 125 to 165°, but the relative maximum number of examples is between 125 to 140°. For three polymorphs the CH···π angle values lie in a normal range. The Scatter-gram for a correlation between H···Cg distance/C-H···Cg angle is depicted in [Figure S3](#). Compounds reported here are approximately around the maximum distribution area in this scatter-gram.

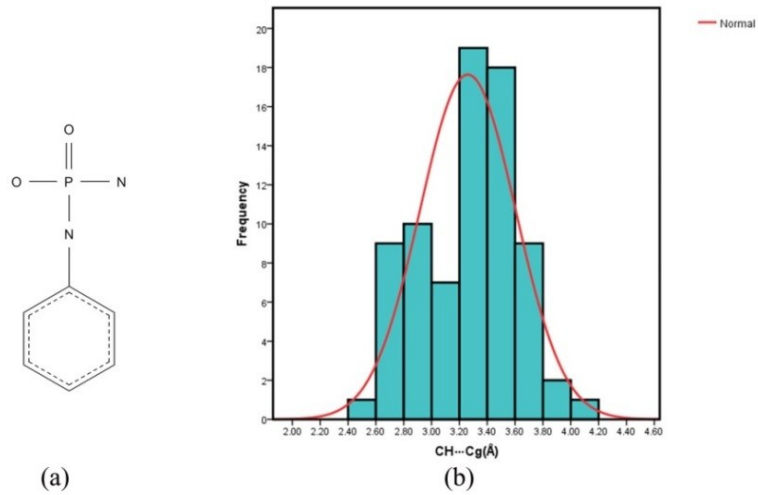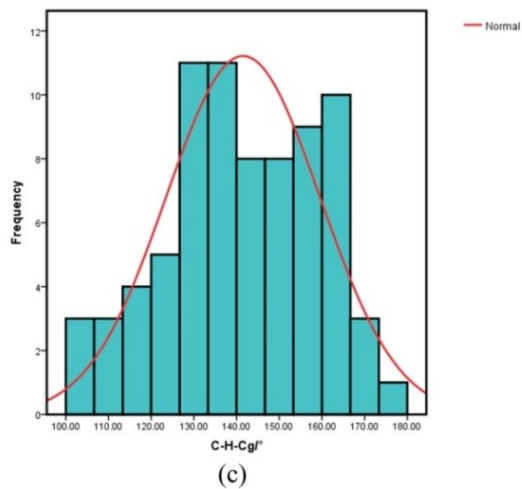

**Figure S2.** (a) A diagram of the molecular fragment used in the CSD search for exploring the conformational behavior and CH... $\pi$  contact in phosphoramidate compounds. Histograms for the (b) H...Cg contact distance and (c) C-H...Cg angle from the CSD search (43 hits containing 79 distinct CH... $\pi$  contacts).

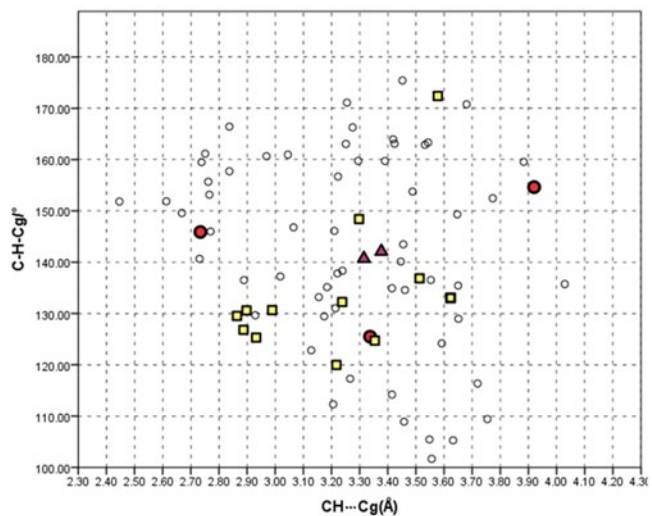

**Figure S3.** The Scattergrams for a correlation between CH... $\pi$  contact distance and angle. The violet triangles, red circles and yellow squares are related to CH... $\pi$  interactions in I, II and III, respectively.

### The Cambridge Structural Database (CSD) analysis of P=O...NH hydrogen bonding in phosphoramidate compounds

Furthermore, for comparing the P=O...H-N hydrogen bonding distance in II and III with the other phosphoramidate compounds, a CSD search based on this intermolecular interaction was carried out. 110 hits, including 169 distinctive P=O...NH hydrogen bond distance were found. The search based on the H...O distance, is shown in Fig S4. The distance values of P=O...NH hydrogen bonding in I and III lie in a normal range in the maximum number of examples bins.

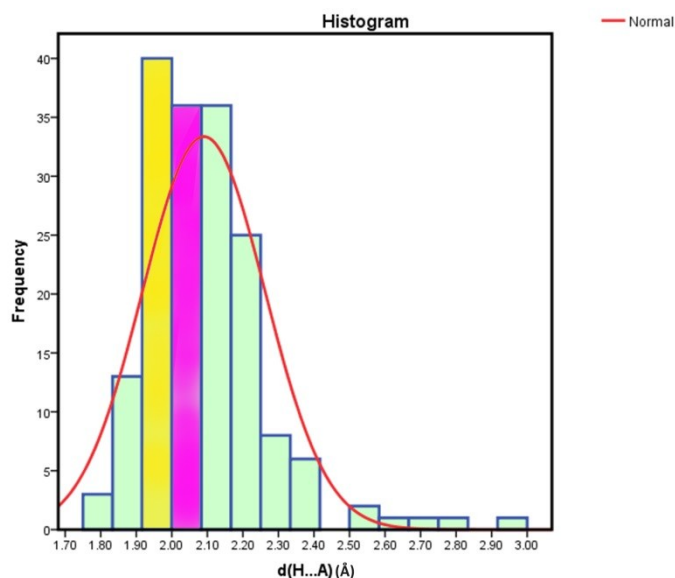

Figure S4. Histograms for the distance between the hydrogen atom of NH and oxygen atom of P=O groups from a CSD search. I and III are shown by violet and yellow columns, respectively.

### Computational study details

Potential energy ( $E_p$ ) of isolated molecule  $L_{OPhAn}$  in different conformations as a function of torsion C-N<sup>^</sup>O-C was calculated. For this purpose, torsion angle C-O<sup>^</sup>N-C was changed in 10 steps from 6 to 176°. In each step the mentioned torsion was frozen and the rest of the molecule was optimized by the MP2<sup>4</sup> approach and 6-311G basis set using Gaussian 09<sup>5</sup> program.

The potential energy of different conformers in the gas phase was calculated separately. For this purpose, the hydrogen atoms of the molecule were optimized and the rest of molecules were frozen by the MP2 approach and 6-311G basis set using Gaussian 09 program.

For NCI calculations, the considered structures were cut out directly from the CIF data and the hydrogen atoms of the molecules were optimized at the B3LYP/6-311G\*\* level. NCI technique was carried out through the analysis of the reduced density gradient (RDG) with low densities<sup>6</sup> at the M062X/6-311+G\*\* level using the Gaussian 09 package and Multiwfn program.<sup>7</sup> For this, The calculated grid points were plotted for a defined real space function,  $\text{sign}(\lambda_2(r))\rho(r)$  and reduced density gradient (RDG) And a visualization of the gradient isosurface was depicted using the VMD 1.9.2 software.<sup>8</sup> The color of the isosurfaces is decided based on the value of  $\text{sign}(\lambda_2)\rho$ . Blue, green and red color codes are commonly used to describe stabilizing H-bonding, van der Waals and steric interaction, respectively. The pictures were provided for an isosurface value of  $s = 0.5$ .

Lattice energy of polymorph I, II.MeOH and III were calculated using the Forcite module of Material Studio 6 with COMPASS force field.<sup>9</sup> The Ewald summation employed to compute the non-bonded interactions that include van der Waals and electrostatic interactions. Finally, lattice energies were computed per molecule based on the number of molecules present in the unit cell

### Hirshfeld surface analysis

the Hirshfeld surfaces and 2D fingerprint plots were produced by crystal explorer 3.1.<sup>10</sup> according to Crystallographic Information Files. It should be explained that for crystal structures where the molecule does not stand on a centre of inversion, intermolecular contacts are different for each side of the molecules. So in Figure 9, the Hirshfeld surfaces of Form III molecules are shown in two views labeled front and back.

### Powder X-ray diffraction

X-ray powder diffraction (XRD) measurements were performed using a X'pert Pro MPD diffractometer with monochromated Cu- $\alpha$  radiation ( $\lambda=1.54056\text{\AA}$ ). The simulated XRD powder pattern based on single crystal data was prepared using Mercury software.

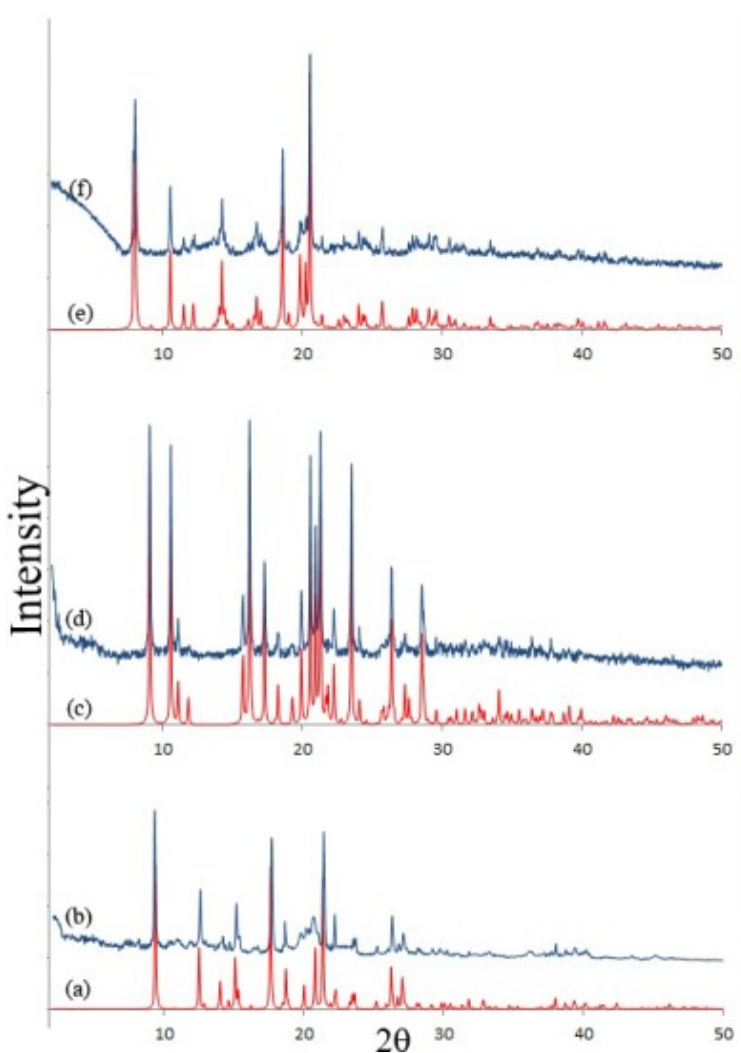

**Figure S5.** The simulated PXRD pattern of polymorphs I calculated from single-crystal data; b) experimental X-ray powder diagram of polymorph I; (c) simulated PXRD pattern of polymorph II.MeOH;(d) experimental X-ray powder diagram of polymorph II.MeOH; (e) simulated PXRD pattern of polymorph III; and (f) experimental X-ray powder diagram of polymorphs III.



## FT-IR spectroscopy

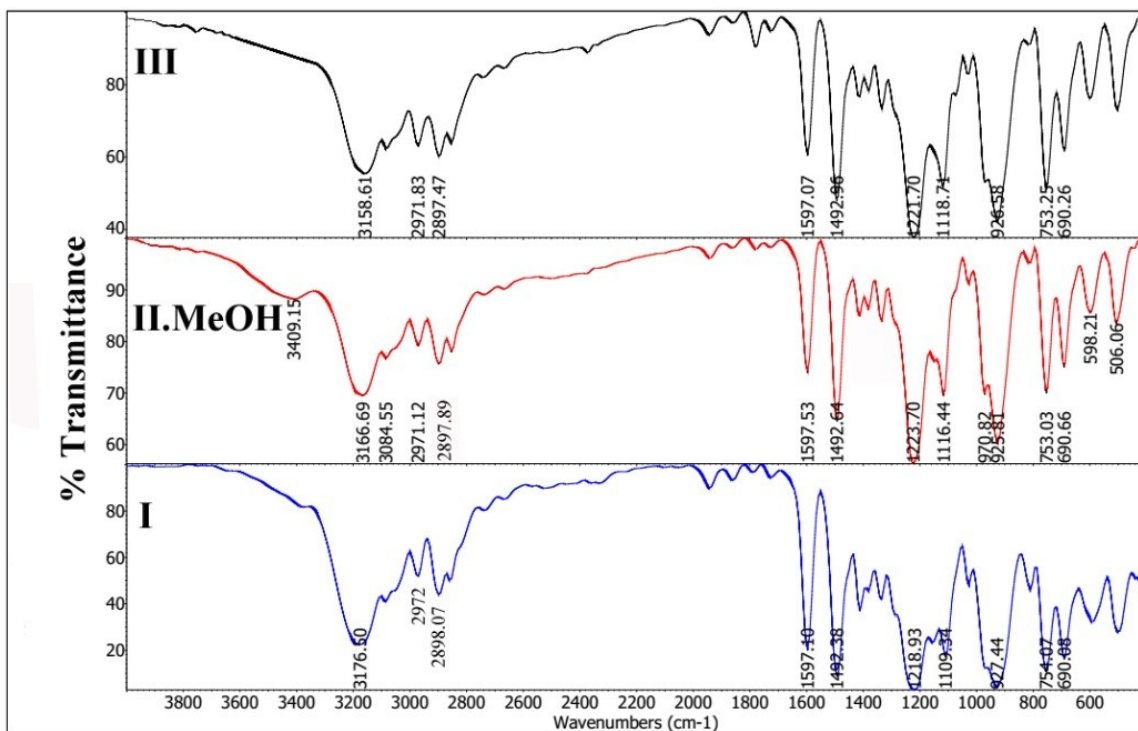

figure S6. FT-IR of I, II.MeOH and III.

Table S5. Vibrational frequency of polymorphs

| FT-IR(Cm <sup>-1</sup> ) | N-H stretch | C-H stretch | P=O stretch | P-O stretch | P-N    |
|--------------------------|-------------|-------------|-------------|-------------|--------|
| <b>I</b>                 | 3176.50     | 2972.8      | 1218.93     | 1109.34     | 927.44 |
| <b>II.MeOH</b>           | 3166.69     | 2971.12     | 1223.70     | 1116.44     | 925.44 |
| <b>III</b>               | 3158.61     | 2971.83     | 1221.70     | 1118.71     | 926.55 |

Table S6. Selected bond distances in the crystal structure of I, II.MeOH and III.

| Compound       | N-H bond distance(Å)               | P=O...NH hydrogen bond distance(Å)     | P=O bond distance(Å)                   |
|----------------|------------------------------------|----------------------------------------|----------------------------------------|
| <b>I</b>       | 0.84(3)                            | 2.12(3)                                | 1.472(1)                               |
| <b>II.MeOH</b> | 0.881                              | ---                                    | 1.470(1)                               |
| <b>III</b>     | 0.86(2); 0.98(2); 0.89(2); 0.91(2) | 1.98(2); 1.931(19); 1.98(2); 1.941(19) | 1.474(1); 1.471(1); 1.476(1); 1.478(1) |

## Thermal analysis

DSC was performed on a Mettler Toledo DSC 822e module. Samples were placed in crimped but vented aluminum sample pans. The temperature range was 30–300°C at a heating rate of 5°C/min.

## References

- 1 Sheldrick, G., SHELX-97: Programs for crystal structure analysis. Göttingen, Germany, 1997.
- 2 Sheldrick, G. *Acta Crystallogr. Sect. A.*, 2008, 64, 112.
- 3 Macrae, C. F.; Bruno, I. J.; Chisholm, J. A.; Edgington, P. R.; McCabe, P.; Pidcock, E.; Rodriguez-Monge, L.; Taylor, R.; van de Streek, J.; Wood, P. A. *J. Appl. Crystallogr.*, 2008, 41, 466.
- 4 Head-Gordon, M.; Head-Gordon, T. *Chem. Phys. Lett.*, 1994, 220, 122.
- 5 M.J. Frisch, G. W. T., H.B. Schlegel, G.E. Scuseria, M.A.; Robb, J. R. C., G. Scalmani, V. Barone, B. Mennucci; G.A. Petersson, H. N., M. Caricato, X. Li, H.P.; Hratchian, A. F. I., J. Bloino, G. Zheng, J.L. Sonnenberg; M. Hada, M. E., K. Toyota, R. Fukuda, J. Hasegawa, M.; Ishida, T. N., Y. Honda, O. Kitao, H. Nakai, T. Vreven; J.A. Montgomery, J., J.E. Peralta, F. Ogliaro, M. Bearpark, J.J.; Heyd, E. B., K.N. Kudin, V.N. Staroverov, R. Kobayashi; J. Normand, K. R., A. Rendell, J.C. Burant, S.S.; Iyengar, J. T., M. Cossi, N. Rega, J.M. Millam, M. Klene; J.E. Knox, J. B. C., V. Bakken, C. Adamo, J. Jaramillo, R.; Gomperts, R. E. S., O. Yazyev, A.J. Austin, R. Cammi; C. Pomelli, J. W. O., R.L. Martin, K. Morokuma, V.G.; Zakrzewski, G. A. V., P. Salvador, J.J. Dannenberg, S.; Dapprich, A. D. D., Ö. Farkas, J.B. Foresman, J.V. Ortiz, J.; Fox, C. a. D. J., Gaussian 09, Revision D.01, Gaussian. Inc., Wallingford, CT 2009.
- 6 Johnson, E. R.; Keinan, S.; Mori-Sánchez, P.; Contreras-García, J.; Cohen, A. J.; Yang, W. *J. Am. Chem. Soc.*, 2010, 132, 6498.
- 7 Lu, T.; Chen, F. *J. Comput. Chem.*, 2012, 33, 580.
- 8 Reed, A. E.; Curtiss, L. A.; Weinhold, F. *Chem. Rev.*, 1988, 88, 899.
- 9 H. Sun. *J. Phys. Chem. B.*, 1998, 102, 7338.
- 10 S. K. Wolff, D. J. Grimwood, J. J. McKinnon, M. J. Turner, D. Jayatilaka and M. A. Spackman, *CrystalExplorer 3.0*, University of Western Australia, Perth, Australia, 2012.
